# Supplementary material
Source: MDPI journal article supplement (https://www.mdpi.com/2071-1050/15/18/13378)
Supplement: s1 [file s1]

# Determination of Residual Municipal Solid Waste Composition from Rural and Urban Areas: A Step toward the Optimization of a Waste Management System for Efficient Material Recovery

Maria Triassi <sup>1</sup>, Bruna De Simone <sup>1</sup>, Paolo Montuori <sup>1,\*</sup>, Immacolata Russo <sup>1</sup>, Elvira De Rosa <sup>1</sup>, Fabiana Di Duca <sup>1</sup>, Claudio Crivaro <sup>2</sup>, Vittorio Cerullo <sup>2</sup>, Patrizia Pontillo <sup>2</sup> and Sergi Díez <sup>3</sup>

<sup>1</sup> Department of Public Health, University “Federico II”, Via Sergio Pansini 5, 80131 Naples, Italy

<sup>2</sup> IrpiniAmbiente S.p.A., Via Cannaviello 57, 83100 Avellino, Italy

<sup>3</sup> Environmental Chemistry Department, Institute of Environmental Assessment and Water Research, Consejo Superior de Investigaciones Científicas (CSIC)—Instituto de Diagnostico Ambiental y Estudios del Agua (IDAEA), Jordi Girona 18-26, 08034 Barcelona, Spain;

\* Correspondence: pmontuor@unina.it

**Table S1.** Avellino’s Municipalities served by logistic center of Rivarano Monteforte Iripino (HPDMs) and Flumeri (LPDMs)

| HPDMs |                              |                            |                                           | LPDMs |                      |                            |                                           |
|-------|------------------------------|----------------------------|-------------------------------------------|-------|----------------------|----------------------------|-------------------------------------------|
| No.   | Municipality                 | Area<br>(Km <sup>2</sup> ) | Density<br>(inhabitants/Km <sup>2</sup> ) | No.   | Municipality         | Area<br>(Km <sup>2</sup> ) | Density<br>(inhabitants/Km <sup>2</sup> ) |
| 1.    | Avellino                     | 30,55                      | 1.718                                     | 1.    | Grottaminarda        | 29,11                      | 266                                       |
| 2.    | Atripalda                    | 8,59                       | 1.217                                     | 2.    | Mirabella Eclano     | 33,96                      | 198                                       |
| 3.    | Cesinali                     | 3,73                       | 688                                       | 3.    | Sant’Andrea di Conza | 7,04                       | 194                                       |
| 4.    | Mercogliano                  | 19,92                      | 584                                       | 4.    | Luogosano            | 6,07                       | 181                                       |
| 5.    | Solofra                      | 22,21                      | 548                                       | 5.    | Fontanarosa          | 16,7                       | 173                                       |
| 6.    | San Michele di Serino        | 4,47                       | 545                                       | 6.    | Sturno               | 16,67                      | 169                                       |
| 7.    | Monteforte Iripino           | 26,96                      | 424                                       | 7.    | Castelfranci         | 11,69                      | 156                                       |
| 8.    | Mugnano del<br>Cardinale     | 12,3                       | 418                                       | 8.    | Taurasi              | 14,41                      | 152                                       |
| 9.    | Pratola Serra                | 8,84                       | 412                                       | 9.    | Sant’Angelo All’esca | 5,46                       | 137                                       |
| 10.   | Aiello del Sabato            | 10,87                      | 369                                       | 10.   | Lioni                | 46,51                      | 129                                       |
| 11.   | Ospedaletto<br>d’Alpinolo    | 5,68                       | 363                                       | 11.   | Gesualdo             | 27,33                      | 120                                       |
| 12.   | Santa Lucia di Serino        | 3,93                       | 357                                       | 12.   | Bonito               | 18,78                      | 119                                       |
| 13.   | Manocalzati                  | 8,75                       | 349                                       | 13.   | Paternopoli          | 18,43                      | 117                                       |
| 14.   | San Potito Ultra             | 4,54                       | 325                                       | 14.   | San Nicola Baronia   | 6,9                        | 110                                       |
| 15.   | Capriglia Iripina            | 7,49                       | 302                                       | 15.   | Villamaina           | 9,04                       | 101                                       |
| 16.   | Contrada                     | 10,31                      | 287                                       | 16.   | Frigento             | 38,04                      | 91                                        |
| 17.   | Quadrelle                    | 6,93                       | 260                                       | 17.   | Vallesaccarda        | 14,12                      | 89                                        |
| 18.   | Grottolella                  | 7,13                       | 255                                       | 18.   | Melito Iripino       | 20,68                      | 87                                        |
| 19.   | Forino                       | 20,39                      | 254                                       | 19.   | Caposele             | 41,28                      | 79                                        |
| 20.   | Prata di Principato<br>Ultra | 10,99                      | 253                                       | 20.   | San Sossio Baronia   | 19,19                      | 79                                        |
| 21.   | Montemiletto                 | 21,63                      | 234                                       | 21.   | Trevico              | 11                         | 79                                        |
| 22.   | Montefredane                 | 9,45                       | 226                                       | 22.   | Montemarano          | 34,01                      | 78                                        |
| 23.   | Pietradefusi                 | 9,24                       | 213                                       | 23.   | Carife               | 16,72                      | 77                                        |
| 24.   | Candida                      | 5,35                       | 206                                       | 24.   | Torella Dei Lombardi | 26,57                      | 74                                        |

|     |                          |       |     |     |                          |        |    |
|-----|--------------------------|-------|-----|-----|--------------------------|--------|----|
| 25. | Montefalcione            | 15,29 | 205 | 25. | Villanova del Battista   | 20     | 74 |
| 26. | Parolise                 | 3,22  | 198 | 26. | Nusco                    | 53,6   | 73 |
| 27. | Santo Stefano del Sole   | 10,78 | 193 | 27. | Flumeri                  | 34,55  | 73 |
| 28. | Venticano                | 14,16 | 162 | 28. | Sant'Angelo dei Lombardi | 55,1   | 71 |
| 29. | Salza Irpina             | 4,96  | 146 | 29. | Castel Baronia           | 15,37  | 70 |
| 30. | Santa Paolina            | 8,43  | 139 | 30. | Scampitella              | 15,11  | 69 |
| 31. | Tufo                     | 5,96  | 133 | 31. | Montecalvo Irpino        | 54,01  | 63 |
| 32. | Serino                   | 52,5  | 129 | 32. | Rocca San Felice         | 14,41  | 55 |
| 33. | Summonte                 | 12,37 | 122 | 33. | Vallata                  | 47,91  | 53 |
| 34. | Torre le Nocelle         | 10,04 | 120 | 34. | Zungoli                  | 19,21  | 51 |
| 35. | Torrioni                 | 4,22  | 108 | 35. | Calitri                  | 101,05 | 42 |
| 36. | Lapio                    | 15,25 | 95  | 36. | Andretta                 | 43,65  | 39 |
| 37. | Petraro Irpino           | 3,14  | 95  | 37. | Morra De Sanctis         | 30,41  | 37 |
| 38. | Volturara Irpina         | 32,42 | 93  | 38. | Bisaccia                 | 102,16 | 35 |
| 39. | Castelvetere sul Calore  | 17,17 | 88  | 39. | Aquilonia                | 56,15  | 27 |
| 40. | Chiusano di San Domenico | 24,6  | 86  | 40. | Savignano Irpino         | 38,47  | 27 |
| 41. | San Mango sul Calore     | 14,59 | 75  | 41. | Lacedonia                | 82,08  | 25 |
| 42. | Chianche                 | 6,61  | 71  | 42. | Conza della Campania     | 51,63  | 25 |
| 43. | Sorbo Serpico            | 8,1   | 66  | 43. | Senerchia                | 32,03  | 23 |
| 44. | Sant'Angelo a Scala      | 10,74 | 65  | 44. | Greci                    | 30,26  | 20 |
|     |                          |       |     | 45. | Cairano                  | 13,81  | 20 |
|     |                          |       |     | 46. | Montaguto                | 18,38  | 19 |
|     |                          |       |     | 47. | Monteverde               | 39,57  | 18 |

---
